# Supplementary material for: HIKESHI silencing can enhance mild hyperthermia sensitivity in human oral squamous cell carcinoma HSC-3 cells
Source: PubMed Central journal article supplement — Int J Mol Med. 2020 Apr 28;46(1):58–66. doi: 10.3892/ijmm.2020.4591 (PMC7255474; doi:10.3892/ijmm.2020.4591), 2020-04-28

Figure S1. Effects of siRNA for luciferase on the mRNA and protein expression levels of HIKESHI in human oral squamous cell carcinoma HSC-3 cells. Cells transfected with siLuc (siRNA for luciferase) were maintained at 37°C. At 48 h after transfection, the cells were harvested. The expression levels of (A) mRNA and (B) protein were detected by quantitative PCR and western blot analyses, respectively. (A) The expression level of HIKESHI mRNA was normalized to the expression level of GAPDH mRNA. Data are presented as means  $\pm$  standard deviation (n=4). (B) A typical result is shown. GAPDH served as a loading control. HIKESHI, heat shock protein nuclear import factor hikeshi.

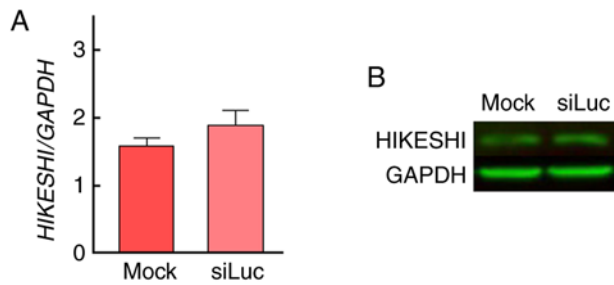

Supplement: Supplementary_Data.pdf [file Supplementary_Data.pdf]
